# Supplementary material for: Final Overall Survival Efficacy Results of Ivosidenib for Patients With Advanced Cholangiocarcinoma With IDH1 Mutation: The Phase 3 Randomized Clinical ClarIDHy Trial
Source: PubMed Central journal article supplement — JAMA Oncol. 2021 Sep 23;7(11):1–10. doi: 10.1001/jamaoncol.2021.3836 (PMC8461552; doi:10.1001/jamaoncol.2021.3836), 2021-09-23
Supplement: jamaoncol-e213836-s003.pdf [file jamaoncol-e213836-s003.pdf]

## Data Sharing Statement

Zhu. Final Overall Survival Efficacy Results of Ivosidenib for Patients With Advanced Cholangiocarcinoma With IDH1 Mutation. *JAMA Oncol.* Published September 23, 2021. doi:10.1001/jamaoncol.2021.3836

### Data

**Data available:** No

### Additional Information

**Explanation for why data not available:** The data collected for the study will not be made available to others. Qualified researchers may request access to related clinical study documents. Please send your data sharing requests to <https://clinicaltrials.servier.com/data-request-portal/>.
